# Supplementary material
Source: PubMed Central journal article supplement (PMC1766414)
Supplement: pnas_0609908104_11.pdf [file pnas_0609908104_11.pdf]

Table 1, Typical intergenic *P. falciparum* DNA

| <i>P. falciparum</i> DNA upstream of PF13_0142                                                                                                                                                                                                                                                                                                                                                                                                                                                                                                                                                                                                                                                                                                                                                                                                                                                                                                                                                                                                                                                                                  |
|---------------------------------------------------------------------------------------------------------------------------------------------------------------------------------------------------------------------------------------------------------------------------------------------------------------------------------------------------------------------------------------------------------------------------------------------------------------------------------------------------------------------------------------------------------------------------------------------------------------------------------------------------------------------------------------------------------------------------------------------------------------------------------------------------------------------------------------------------------------------------------------------------------------------------------------------------------------------------------------------------------------------------------------------------------------------------------------------------------------------------------|
| TATATAAATATATATTATACGTACATATTTATGTATCATATTTTAAATT<br>ATTCCTTTTTTACTTGACTTGTTACATGATCATATATATCTCCCCACA<br>AAAAAATGAAAAATATATAAATATTATAAATATATATAAATATATATTA<br>TATATATTTAATCACCTTACATTTATAGCTTAAATCACTTGGTTGTTTAT<br>TTTAAAAAAGCTTTTAATTTTTATTTTTCTTAAATTTCAATTTATCAATTAG<br>GATACCTAAATTATAATTATATAGAAAAAGGTACATATATATATATATA<br>TATATAGAATAAACAAATGAACAAACATTTCTCATAAAAAAATATAAAAT<br>AAAGATAAAAAATAAAAAATATAAAAAACATGTATATTATATATATTCATTAT<br>TTTAATTTTTTTGATTTATTTTAATATATATATATATATATATATATA<br>TAATATACCTCACTAAAATATTCATCATATTTTATAAACAAAATATTGTA<br>AAATAAATACAAATATATTATATATATATTGAACAATTCGTAATTTTTT<br>TTTTTTTTTTTTTTTTTTTTTTTTTTTTGATTTTATTTTGAAAAGGTTCTAAAACA<br>AACAAAGGTATGATTTATCTCTTTTCATTAATAATTATTTTATTTTGTCCACCA<br>ATATTTTTTATGATAAATATTATATACATATAATTAGTAAAATATAAATA<br>TTATATATATTATATATATATATATATATATATATATATATTATATATAATAT<br>ATTTTATATATATATACATATTTGAATTAAAATTTATTCGATTAAATAAA<br>GAAATATTAGTCCCTTTTTGTGGTAAAAAATTGAGGAGCATTCTTATTT<br>TTATGAAATAATAAAAAAATATATTTATATGGAAGCTTCATAAAAAATAAA<br>ATTTATATAAGCACACAAATATATATTTTATATCATTTCACTATGTCAACA<br>AATTCGCCAAAGGATTTTGTGGAAAGTTTAAAAGGTCGAGCAGTAATTGT |
