# Supplementary material
Source: PubMed Central journal article supplement (PMC1766414)

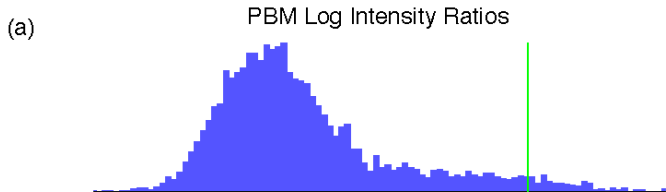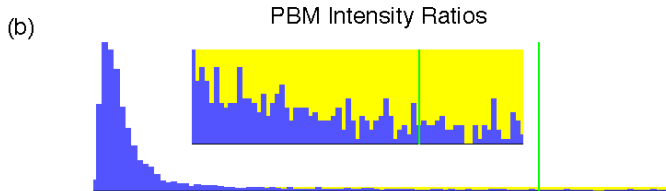

Supplement: pnas_0609908104_1.pdf [file pnas_0609908104_1.pdf]

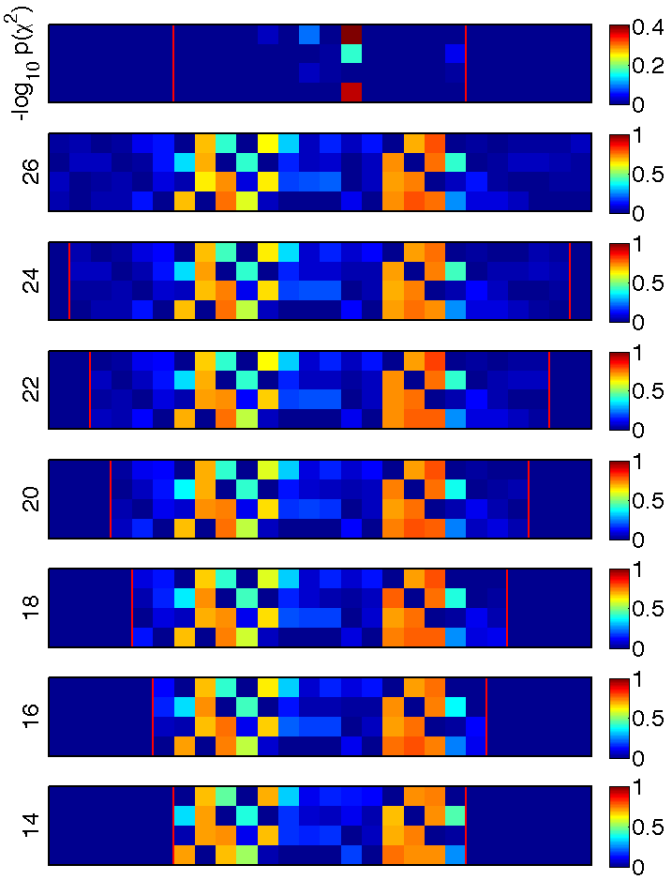

Supplement: pnas_0609908104_10.pdf [file pnas_0609908104_10.pdf]

PBM Means, 20 Seqs/Bin

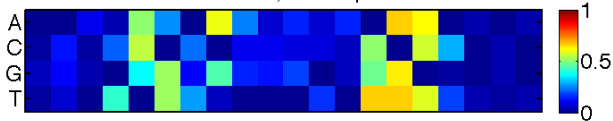

PBM Means, 50 Seqs/Bin

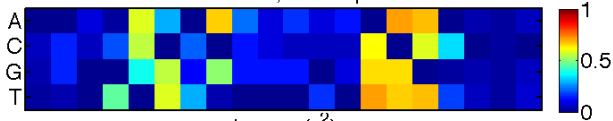

(c)  $-\log_{10} p(\chi^2)$

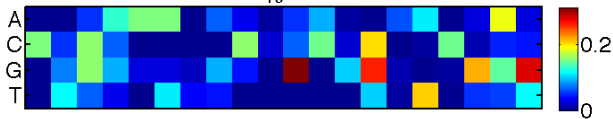

Supplement: pnas_0609908104_2.pdf [file pnas_0609908104_2.pdf]

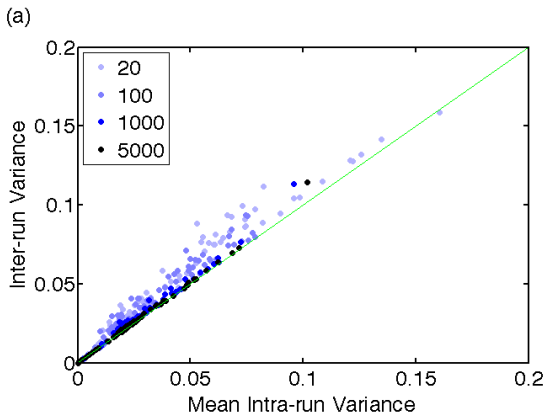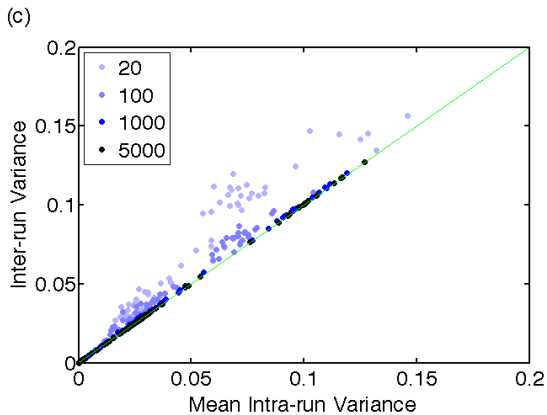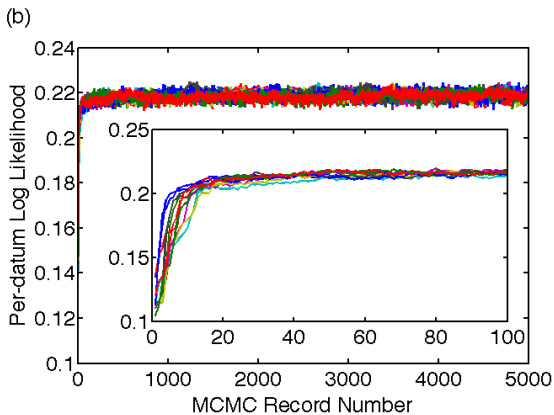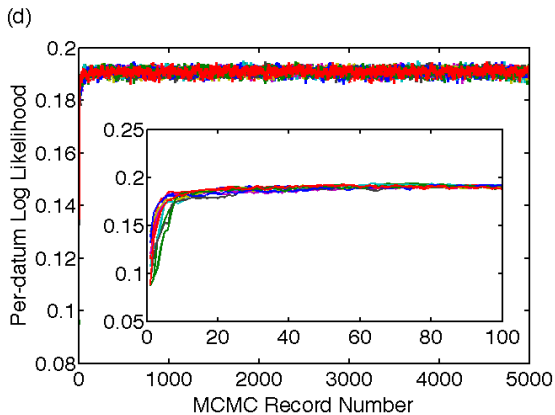

Supplement: pnas_0609908104_3.pdf [file pnas_0609908104_3.pdf]

(a) PBM Means, A Half

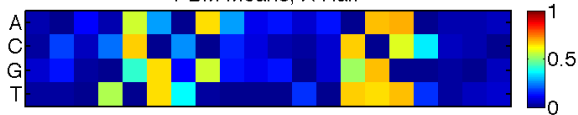

(b) PBM Means, B Half

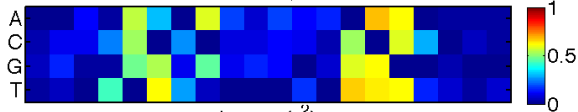

(c)  $-\log_{10} p(\chi^2)$

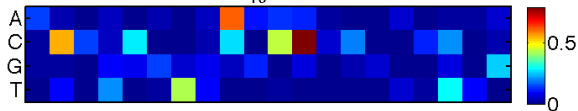

Supplement: pnas_0609908104_4.pdf [file pnas_0609908104_4.pdf]

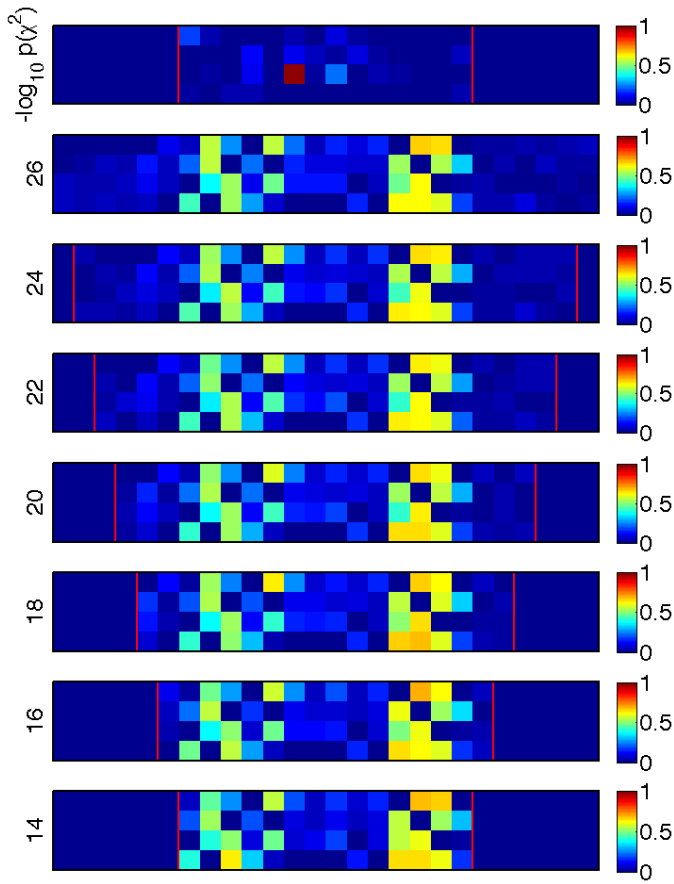

Supplement: pnas_0609908104_5.pdf [file pnas_0609908104_5.pdf]

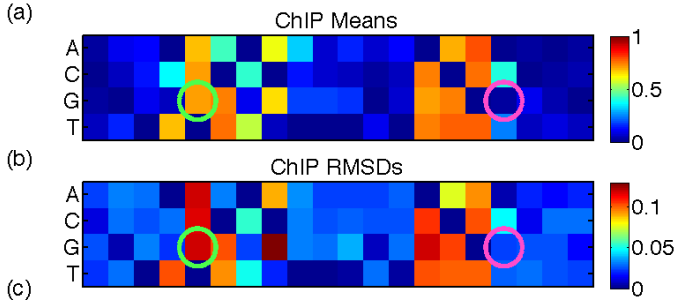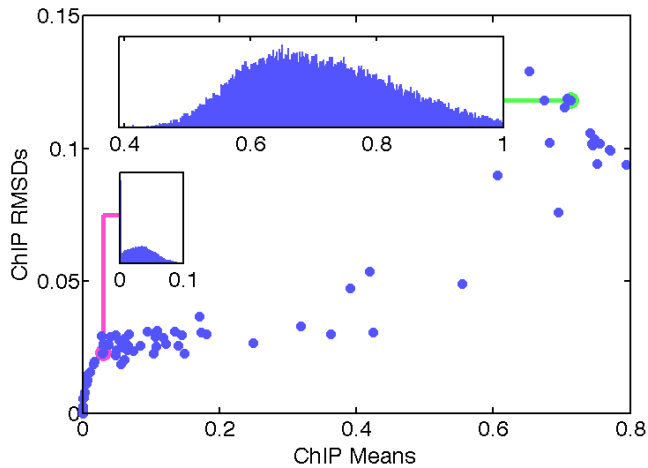

Supplement: pnas_0609908104_6.pdf [file pnas_0609908104_6.pdf]

(a)

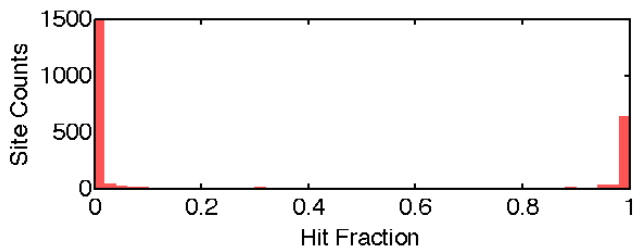

(b)

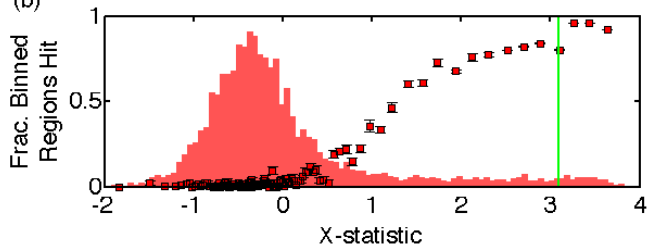

(c)

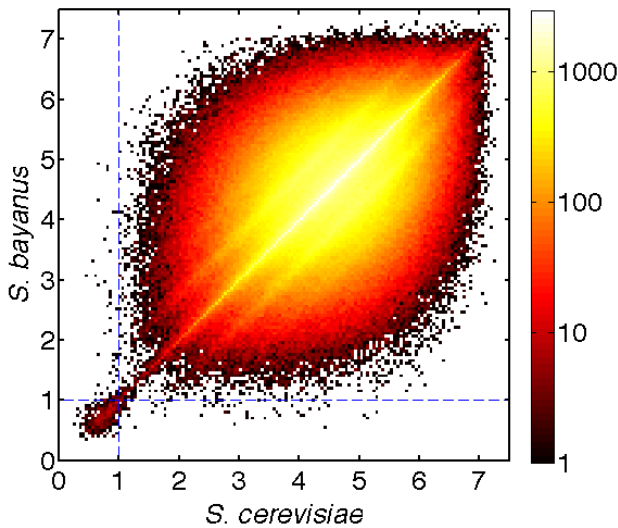

Supplement: pnas_0609908104_7.pdf [file pnas_0609908104_7.pdf]

(a)

ChIP Means, A Half

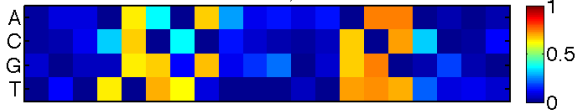

(b)

ChIP Means, B Half

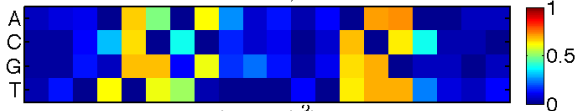

(c)

 $-\log_{10} p(\chi^2)$ 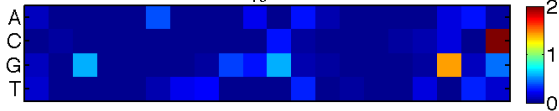

Supplement: pnas_0609908104_8.pdf [file pnas_0609908104_8.pdf]

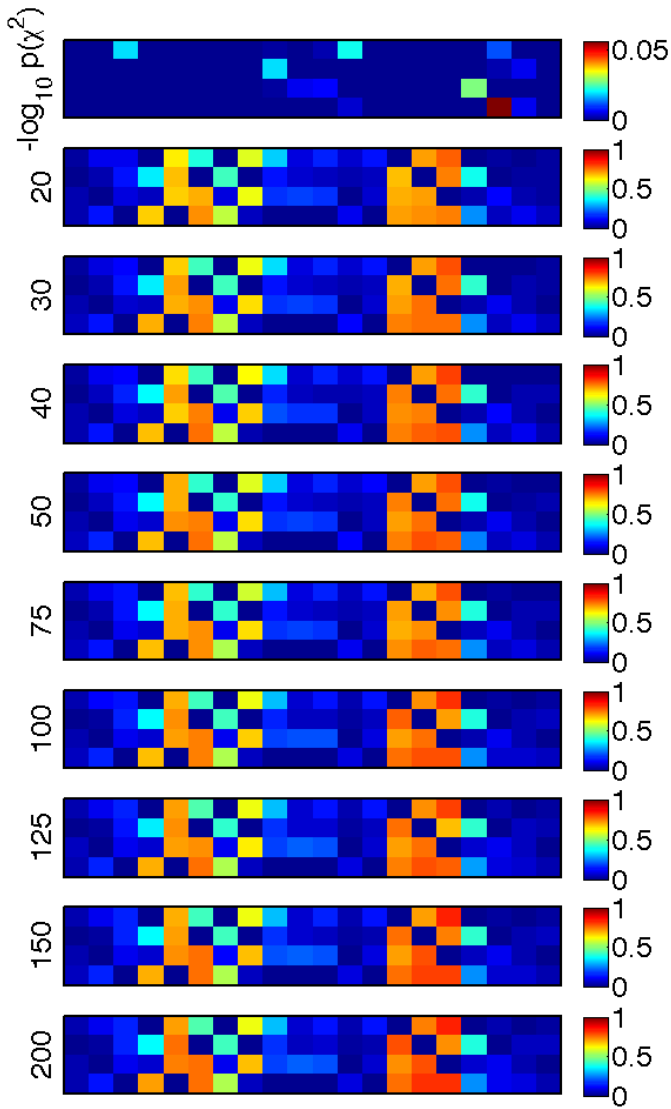

Supplement: pnas_0609908104_9.pdf [file pnas_0609908104_9.pdf]
